## 1 Optimum time for hand pollination in yam (*Dioscorea* spp.)

2  
3 Jean M. Mondo<sup>1,2,3</sup>, Paterne A. Agre<sup>1,\*</sup>, Robert Asiedu<sup>1</sup>, Malachy O. Akoroda<sup>4</sup>, Asrat Asfaw<sup>1</sup>

4 <sup>1</sup>International Institute of Tropical Agriculture (IITA), Ibadan 5320, Nigeria

5 <sup>2</sup>Institute of Life and Earth Sciences, Pan African University, University of Ibadan, Ibadan 200284,  
6 Nigeria

7 <sup>3</sup>Department of Crop Production, Université Evangélique en Afrique (UEA), Bukavu 3323,  
8 Democratic Republic of Congo

9 <sup>4</sup>Department of Agronomy, University of Ibadan, Ibadan 200284, Nigeria

10  
11 \*Correspondence: [p.agre@cgiar.org](mailto:p.agre@cgiar.org)

### 14 Abstract

15 Hand pollination success rate is low in yam (*Dioscorea* spp.), due partly to suboptimal weather  
16 conditions. Thus, determining the most suitable time for pollination could improve the pollination  
17 success in yam breeding programs. We performed continuous hand pollination within flowering  
18 windows of *D. rotundata* and *D. alata* for two consecutive years to determine the most appropriate  
19 month, week, and hours of the day allowing maximum pollination success. In *D. alata* crossing  
20 block, we observed significant differences among crossing hours for pollination success ( $p =$   
21  $0.003$ ); morning hours (8–12 a.m.) being more conducive than afternoons (12–5 p.m.). No  
22 significant differences existed between crossing hours in *D. rotundata*, though the mid-day seemed  
23 optimal. For both species, the time interval 11–12 a.m. was more appropriate for crossing while  
24 4–5 p.m. was the poorest. However, *in vitro* pollen germination tests showed that mid-day pollen  
25 collection (12 noon – 2 p.m.) had better results than both extremes, though there were strong  
26 genotypic effects on outcomes. Pollination success rates differed significantly among months for  
27 *D. alata* ( $p < 0.001$ ) but not for *D. rotundata* ( $p > 0.05$ ). Differences in pollination success existed  
28 across weeks within flowering windows of both *D. alata* ( $p < 0.001$ ) and *D. rotundata* ( $p = 0.004$ ).  
29 The seed production efficiency (SPE) had a similar trend as the pollination success rate. No clear  
30 pattern existed between the pollination time and the seed setting rate (SSR) or seed viability (SV),  
31 though their dynamics varied with weeks and months. This study provided an insight on the  
32 dynamics of pollination outcomes under the influence of pollination times and allows detecting  
33 months, weeks, and hours of the day when hybridization activities should be focused for better  
34 results.

35  
36 **Keywords:** Pollination success, dioecy, seed setting rate, seed viability, pollen viability, weather  
37 conditions.

### 40 Introduction

41 Yam (*Dioscorea* spp.) is a multispecies staple crop with significant contributions to food security  
42 and poverty alleviation in tropics and subtropics, especially in West Africa where it is extensively  
43 produced (Asiedu and Sartie, 2010). Its cultivation faces several yield restricting and quality  
44 reducing factors related to poor crop husbandry, biotic and abiotic stresses, and postharvest losses

45 that widen the gap between the farmer yields ( $\sim 10 \text{ t ha}^{-1}$ ) and the crop potential ( $40\text{--}50 \text{ t ha}^{-1}$ ) and  
46 reduce the market penetration (Frossard et al., 2017). Plant breeding research is an integral  
47 component of addressing these challenges by development and delivery of resilient, productive,  
48 and high-quality varieties. However, improved cultivar development through breeding in yam is  
49 challenged by sexual reproduction abnormalities resulting from sparse, irregular, and  
50 asynchronous flowering, cross compatibility barriers as the vegetative propagation is favored at  
51 the expense of botanical seeds during the domestication and subsequent cultivation process  
52 (Mondo et al., 2020). Yam plant exhibits extremely low levels of fruit-to-flower and seed-to-ovule  
53 ratios, partly because of the sensitivity of its reproductive phases to suboptimal weather conditions  
54 (Mondo et al., 2022). Important climatic factors such as temperature, rainfall, relative humidity,  
55 and light intensity fluctuate from one location to the other and even from time to time in the same  
56 location. These fluctuations dictate the limit within which controlled pollination can be  
57 successfully conducted in any given location for a given species (Salami, 2016; Maity et al., 2019;  
58 Raina and Kaul, 2019; Katano et al., 2020; Mondo et al., 2022).

59 Several attempts were undertaken to improve hand pollination success rate in yam breeding  
60 programs by determining the appropriate time for crossing (Akoroda et al., 1981; Akoroda, 1983;  
61 Abraham and Nair, 1990; Bakayoko et al., 2019; Mondo et al., 2020). However, the optimum time  
62 for yam pollination is location-specific and depends on local environmental conditions (Mondo et  
63 al., 2020). High relative humidity, well-distributed rainfall, sunshine, and moderate atmospheric  
64 temperatures are the leading climatic factors for successful pollination in *D. alata* and *D. rotundata*  
65 yams (Abraham and Nair, 1990; Mondo et al., 2022). Recommended time for hand pollination in  
66 Nigeria (12 noon–3 p.m.) was set  $\sim 40$  years ago (Akoroda, 1983), thus, there is a chance that trends  
67 recorded four decades ago may have changed. Besides, due to predominant sunny conditions at  
68 the previously recommended crossing hours, crossing activities are seldom undertaken at mid-day  
69 (Mondo et al., 2020). Pollinators most conveniently operate in morning hours (8 a.m.–12 noon).  
70 Yet, no study assessed the pollination success rates at those hours compared to the mid-day hours  
71 recommended by the literature.

72 Most yam species, including *D. alata* and *D. rotundata*, are dioecious with male and female  
73 flowers on separate individuals (Agre et al., 2020; Mondo et al., 2020; 2021a; 2022). The gene  
74 flow between and among these species to meet breeding objectives depends, therefore, on cross-  
75 pollination success. The cross-pollination involves three phases: the release of pollen from the  
76 anther, transfer of pollen from the anther to the stigma, and successful placement of pollen on  
77 receptive stigma surface, followed by germination (Di-Giovanni and Kevan, 1991; Bhattacharya  
78 and Mandal, 2004; He et al., 2017). The transfer of yam pollen from the anther to the stigma is  
79 either by the assistance of local insects (natural) or human hand (artificial) since the sticky nature  
80 of yam pollen renders the wind pollination impossible (Mondo et al., 2020). However, the insects'  
81 inefficiency is a major factor of low natural pollination success in yam (Akoroda, 1985; Segnou et  
82 al., 1992). This insects' inefficiency is associated with low visitation rate, limited movements, and  
83 selectivity (Martin et al., 1963; Mondo et al., 2020). Hand pollination is used as an alternative  
84 solution; it is 2–3 times more efficient than natural pollination by insects (Akoroda, 1983; Segnou  
85 et al., 1992). Whether natural or artificial, the pollination success is associated with other factors  
86 such as pollen viability, stigma receptivity, cross compatibility, and the prevailing weather  
87 conditions (Lebot et al., 2019; Mondo et al., 2020; 2022).

88 This study aims at improving pollination success in yam breeding programs by assessing the  
89 optimum time of pollination, when the pollen is fully viable, the stigma receptive, and the weather

90 is conducive in *D. alata* and *D. rotundata* crossing blocks. It uses crossing block, *in vitro* pollen  
91 germination, and weather data for assessment.

## 92 **Materials and methods**

### 93 **Study site, plant material, and field establishment**

94 Two-year experiment was conducted at the International Institute of Tropical Agriculture (IITA)  
95 Ibadan (7°29' N and 3°54' E), Nigeria, from April 2020 to February 2022. Six female parents  
96 (three *D. rotundata* and three *D. alata*) were selected based on the length of their flowering window  
97 and flowering intensity. On the other hand, six male parents (three per species) were used as pollen  
98 sources. All these materials were breeding lines maintained by the IITA Yam Breeding Unit (S1  
99 Table). The cross-compatibility among selected genotypes and their ploidy statuses were based on  
100 historical data information (Mondo et al., 2022).

101 The planting was done in April for both species and seasons. Male and female crossing blocks  
102 were grown at appropriate spacing (1 m × 1 m). Recommended field management was conducted,  
103 including individual plant staking, fertilizer application, supplemental irrigation, regular weeding,  
104 etc. Pollination on *D. rotundata* crossing blocks were carried out from August to mid-October  
105 while it started in late September and ended in early December for *D. alata*. Weather data in the  
106 field was recorded using a data logger for the entire research period (Fig 1).

107 Among weather conditions, the solar radiation fluctuated much across flowering weeks (107.3 MJ  
108 m<sup>-2</sup> day<sup>-1</sup> in week 6 to 188.6 MJ m<sup>-2</sup> day<sup>-1</sup> in week 21). The wind speed varied with weeks (week  
109 15 had lowest wind speed: 0.5 km ha<sup>-1</sup> while week 4 had highest speed: 5.1 km ha<sup>-1</sup>). Maximum  
110 and minimum temperatures followed similar trends across weeks: week 21 had the highest  
111 minimum (27.5°C) and maximum temperatures (28.6°C). The relative humidity ranged from 72.0  
112 to 96.1% (Fig 1).

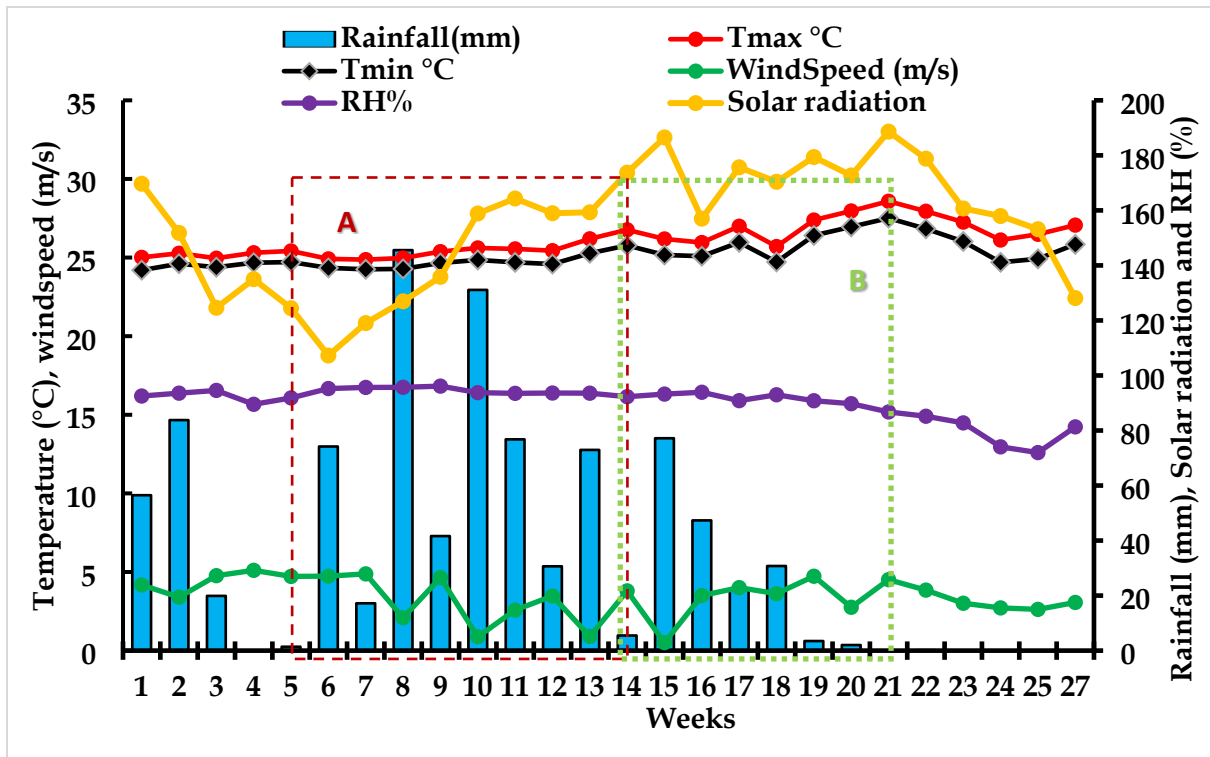

113

114 **Fig 1. Weekly weather data information of 2020 and 2021 crossing windows, IITA Ibadan station.**  
 115 Week 1 corresponds to 1<sup>st</sup> week of July while Week 27 corresponds to the last week of December. (A) *D.*  
 116 *rotundata* crossing window started early August (Week 5) and ended mid-October (Week 14). (B) *D. alata*  
 117 crossing window started in mid-October (Week 14) and ended early December (Week 21).

118 Weather conditions varied with hours of the day: solar radiation, maximum and minimum  
 119 temperatures were highest at the midday (11 a.m.–3 p.m.). The relative humidity had an opposite  
 120 trend than temperatures, midday (1–4 p.m.) having lowest values (63.3–65.5%) than morning and  
 121 night hours (Fig 2).

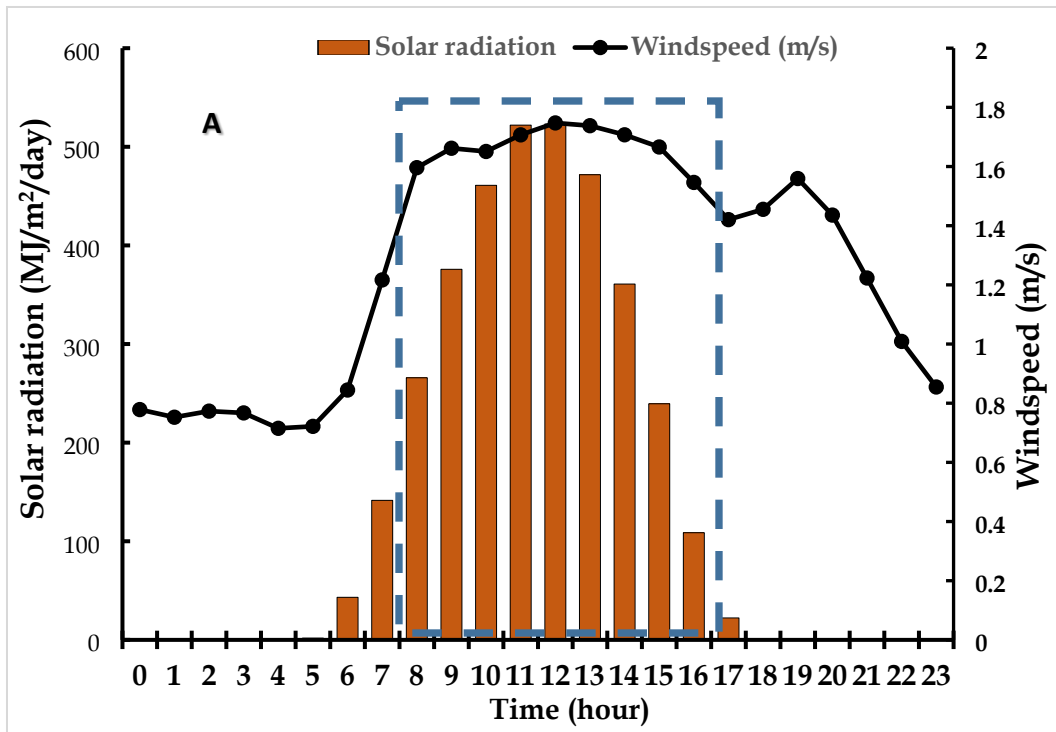

122

123

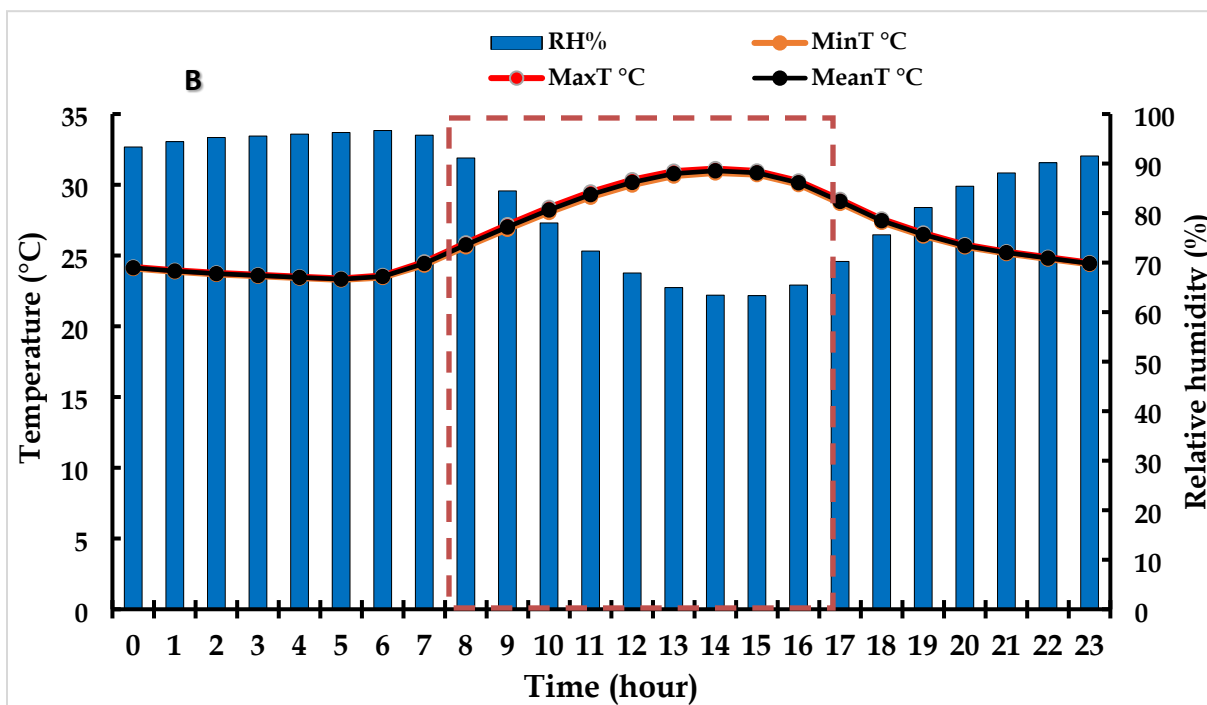

124

125 **Fig 2. Variations in weather conditions throughout the day during 2020-2021 flowering windows at**  
126 **IITA, Ibadan, Nigeria.** On the time axis, 0 refers to midnight while 23 refers to 11 p.m. of the same day.  
127 Highlighted hours (8 a.m. to 5 p.m.) correspond to crossing hours. (A) trends of daily variations in solar  
128 radiation and windspeed, (B) trends of daily variations in temperatures and relative humidity.

## 129 **Pollen viability assessment**

130 *In vitro* pollen germination testing was performed regularly to ensure pollination results were not  
131 influenced by the pollen viability status. The previously optimized pollen germination testing  
132 protocol by Mondo et al. (2021a) was used. This consisted of culturing anthers with pollen on Petri  
133 dishes containing a nutritive medium made of 10% sucrose, 100 ppm H<sub>3</sub>BO<sub>3</sub>, 300 ppm  
134 Ca(NO<sub>3</sub>)<sub>2</sub>·4H<sub>2</sub>O, 200 ppm MgSO<sub>4</sub>·7H<sub>2</sub>O, and 100 ppm KNO<sub>3</sub>. This medium was supplemented  
135 with 0.5% agar and adjusted at pH 6.5. The culture was incubated at dark for 3 h under 25°C. The  
136 pollen germination output was visualized under a fluorescence microscope (Olympus BX51,  
137 Tokyo, Japan) at 10× magnification. The stigma receptivity was determined using visual  
138 observation of the female flowers prior the crossing.

## 139 **Hand pollinations**

140 At flowering, female flowers were bagged with thrip-proof cloth-bags five days before pollination.  
141 Hand pollinations between selected male and female plants were carried out from 8:00 a.m. to 5:00  
142 p.m. for the entire flowering window. A cumulative number of 9,775 *D. rotundata* and 6,565 *D.*  
143 *alata* female flowers were hand-pollinated with fresh pollen across crossing hours for the two  
144 seasons. At each pollination day, an equal number of female flowers were pollinated hourly. The  
145 pollinated flowers were then kept bagged for two weeks to ensure the purity of offspring from  
146 crosses.

147 Following data were collected to assess the optimal time for hand pollination: (1) date of  
148 pollination, (2) time of pollination, (3) fruit set (evaluated two weeks after pollination), and (4) the  
149 seed set at plant physiological maturity. After fruit processing, the seed viability was also assessed.

150 Data collected on the fruit and seed sets were further used to calculate the pollination success rate,  
151 the seed setting rate (SSR), the seed production efficiency (SPE), and the seed viability (SV) as in  
152 Mondo et al. (2021b, 2022). The pollination success rate was calculated as follows:

$$153 \quad \text{Pollination success (\%)} = \frac{\text{Number of fruits set}}{\text{Number of flowers pollinated}} \times 100 \quad (1)$$

154 The seed setting rate (SSR) was the ratio between the number of seeds from a cross and the number  
155 of fruits multiplied by six (which is the expected number of seeds in a yam fruit):

$$156 \quad \text{Seed setting rate (\%)} = \left( \frac{\text{Number of seeds set}}{\text{Number of fruits set} \times 6} \right) \times 100 \quad (2)$$

157 The seed production efficiency (SPE) for a cross was calculated as the number of viable seeds  
158 divided by six times the number of pollinated flowers multiplied by 100:

$$159 \quad \text{SPE (\%)} = \frac{\text{Number of viable seeds}}{\text{Number of flowers pollinated} \times 6} \times 100 \quad (3)$$

160 The seed germination rate was estimated by dividing the seedling stand count in nurseries by the  
161 number of seeds sown multiplied by 100:

$$162 \quad \text{Seed viability (\%)} = \frac{\text{Number of seeds germinated}}{\text{Number of seeds sown}} \times 100 \quad (4)$$

### 163 **Statistical data analysis**

164 The analysis of variance (ANOVA) was performed to detect differences among pollination  
165 successes, SPE, SSR, and SV using the pollination month, week, and hour of the day as factors.  
166 When necessary, means were separated by the least significant difference (LSD) test at 0.05 p-  
167 value threshold. Analyses and plotting of graphs were performed using ggplot2 package in R.

## 168 **Results**

### 169 **Pollination success across crossing time**

170 There were significant differences among crossing hours for pollination success in *D. alata* ( $p =$   
171  $0.003$ ), morning hours (8–11 a.m.) being better than afternoons (12–4 p.m.) (Fig 3A, S2 Table).  
172 No significant difference existed between crossing hours in *D. rotundata* crossing blocks ( $p =$   
173  $0.618$ , Fig 3B) though the mid-day seemed optimal for hand pollination. Based on the crossing  
174 block data, 11 a.m. could be considered as optimal for both species (18.6% for *D. alata* and 40.3%  
175 for *D. rotundata*). Lowest rates were recorded at 4 p.m. for both species (3.3% for *D. alata* and  
176 30.5% for *D. rotundata*). Though both crossing time and genotype had a significant effect on the  
177 pollination outcome ( $p < 0.001$ ), their interaction was not significant (S2 Table). *In vitro* pollen  
178 germination data showed, however, that mid-day pollen collection had better results than both  
179 extremes though the response was genotype-specific ( $p = 0.0014$ ; Fig 4, S1 Fig). Pollen germinated  
180 most between 12 noon and 2 p.m. (18.7–20% for *D. alata* and 22.9–25.3% for *D. rotundata*).

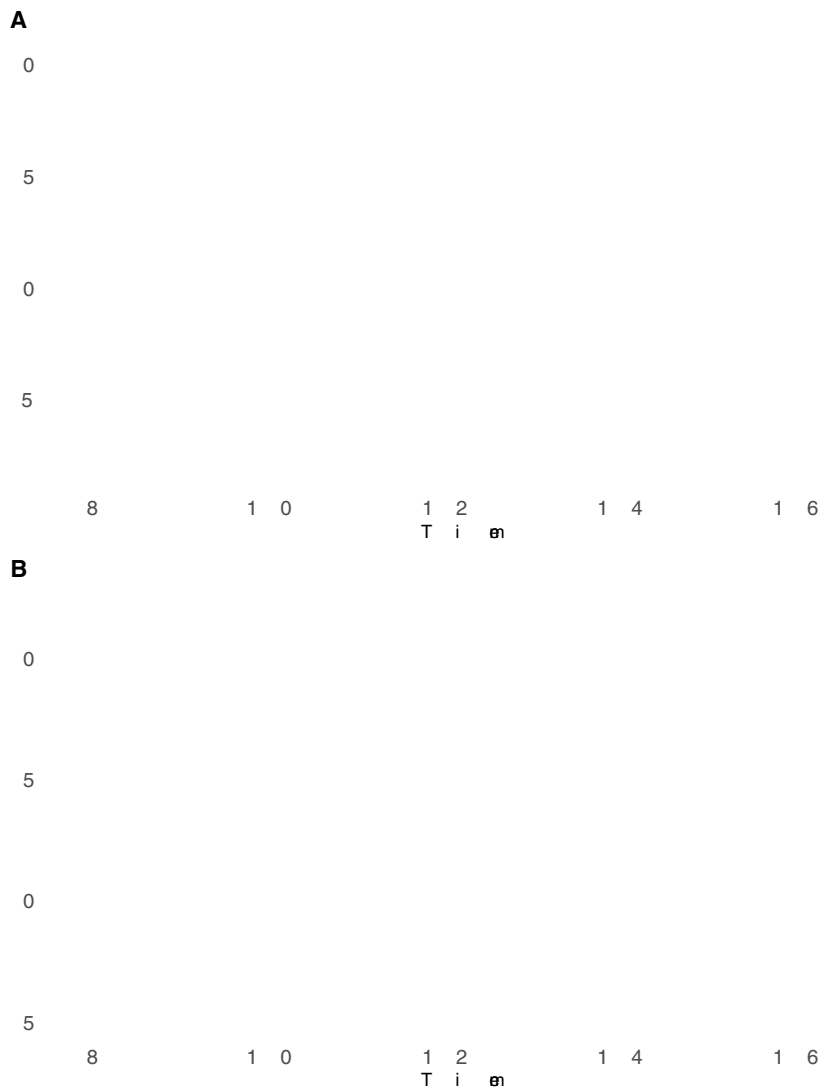

181

182

**Fig 3. Pollination success across crossing hours: (A) *D. alata*, (B) *D. rotundata***



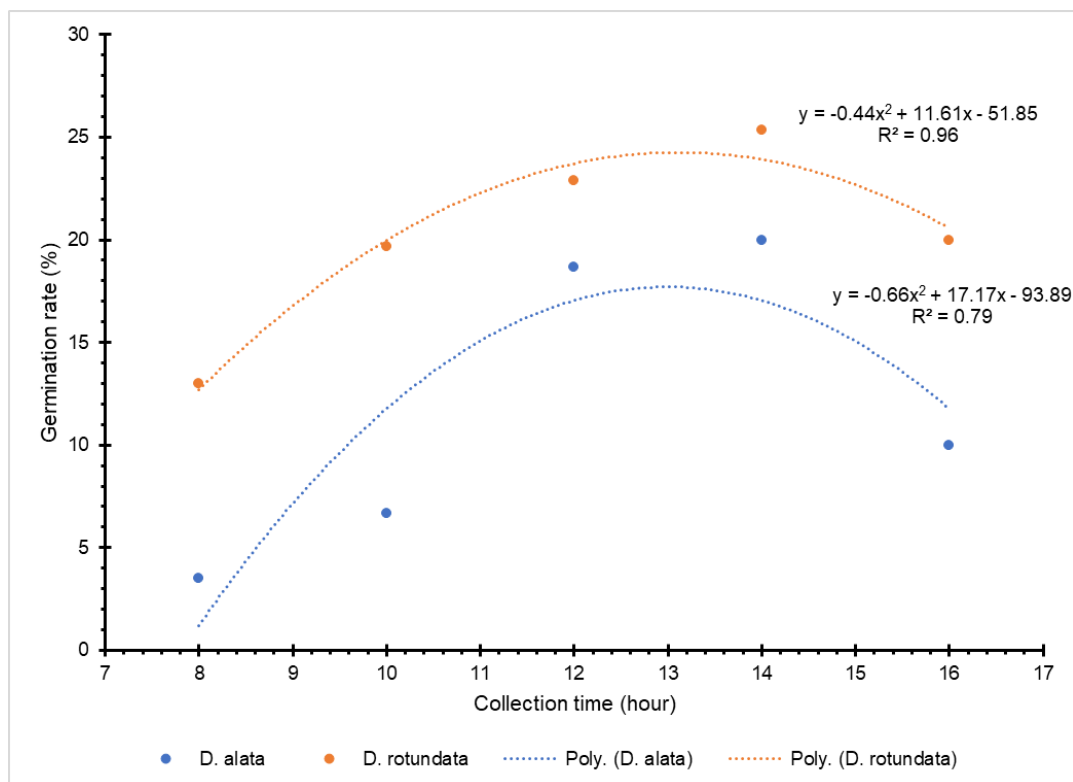

183

184

**Fig 4. Dynamics of pollen germination rates across day hours**

185

#### **Year, month and weekly effects on pollination success and seed set**

186

187

188

189

190

191

192

193

194

195

Pollination success rate was higher in 2021 (29.1%) than 2020 (20.5%) regardless of the species (Fig 5). There were significant differences in pollination success rates among months for *D. alata* ( $p < 2.2e-16$ ) but not for *D. rotundata* ( $p = 0.053$ ). During *D. alata* crossing window, October (32.9%) was consistently the optimum month for pollination across both years while November (6.9%) and December (5.6%) had poor pollination success rates. For *D. rotundata* on the other hand, September had relatively best results across years while rates were lowest in October. The pollination success rate varied across weeks within the flowering window ( $p < 2.2e-16$  for *D. alata* and  $p = 0.004$  for *D. rotundata*) (Fig 6). The peak for *D. alata* (35.5–51.0%) was reached during the third week and then started decreasing. *D. rotundata* peak (36.6–68.9%) was observed at week 5 and then started decreasing to reach its minimum pollination rate at week 8 (15.3–19.5%).

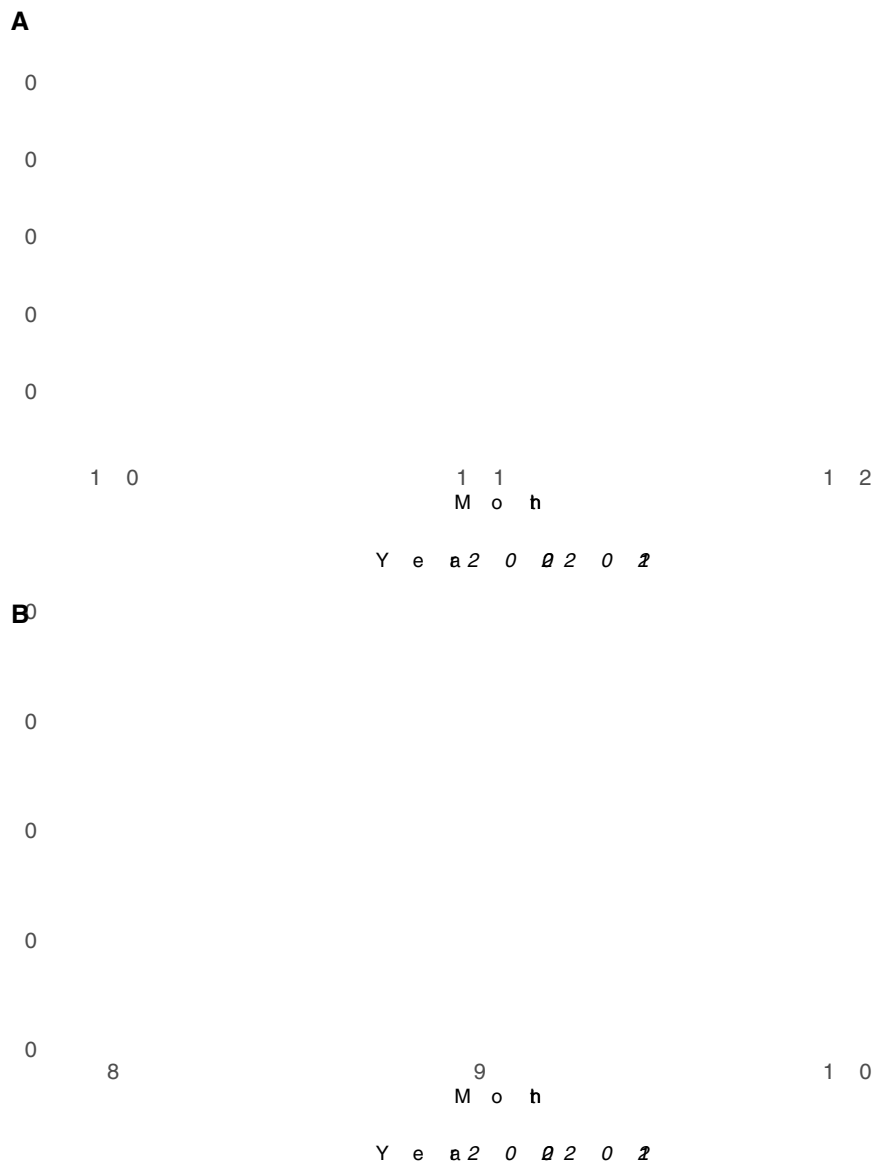

196

197 **Fig 5. Pollination success rates across crossing months for 2020 and 2021. (A) *D. alata* and (B) *D.***  
 198 ***rotundata*.** The number 8 refers to August and 12 to December.

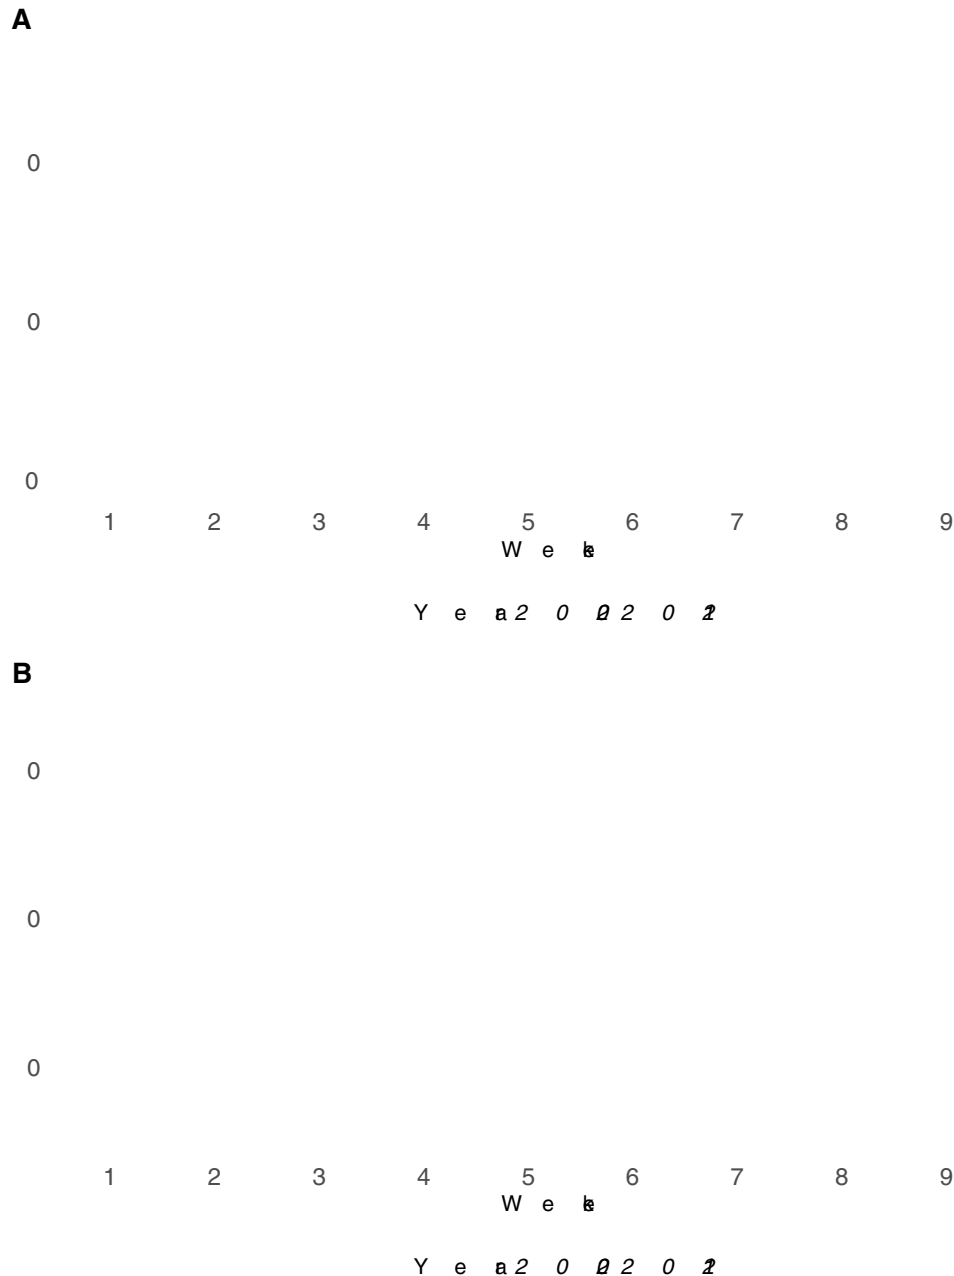

199

200 **Fig 6. Pollination success rates across crossing weeks for 2020 and 2021. (A) *D. alata* and (B) *D.***  
201 ***rotundata*.** Week 1 for *D. alata* corresponded to the second week of October while week 9 was the  
202 second week of December. Week 1 for *D. rotundata* referred to second week of August while  
203 week 9 corresponded to the second week of October.

#### 204 **Bagging-to-crossing time interval and pollination success**

205 There was an association between the pollination success rate and the bagging-to-crossing time  
206 interval ( $R^2=0.97$ ,  $p<0.001$ ). Results suggested that 4–6 days is the optimal interval between flower  
207 bagging and crossing time (Fig 7, S2 Fig). The pollination success within that interval ranged from

208 44.4–50.2% while the lowest success rate was recorded for crosses made within two days after  
209 bagging (14.5%).

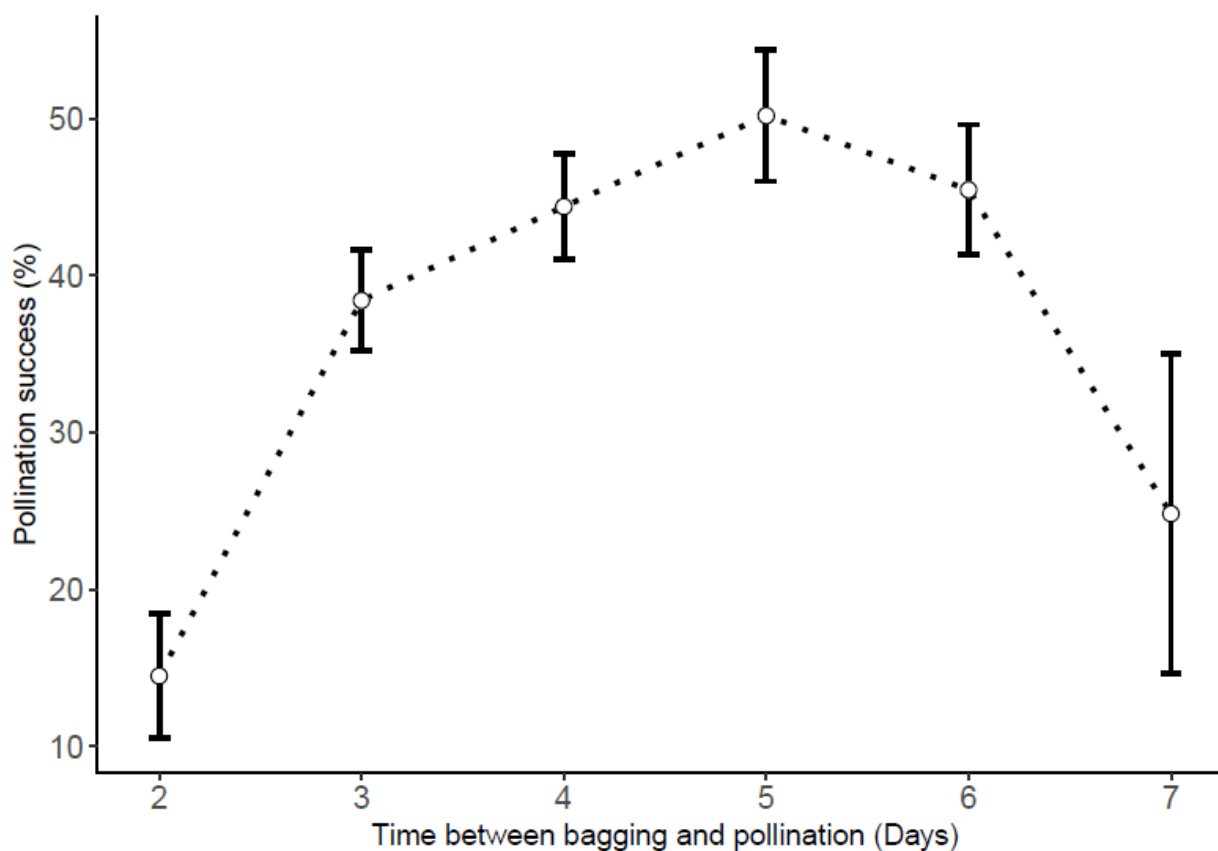

210  
211 **Fig 7. Influence of the time interval between flower bagging and crossing on pollination success rates.**

#### 212 **Dynamics of SPE, SSR, and SV across crossing times**

213 Only the SPE was influenced by the hour of pollination, no particular pattern existed for SSR and  
214 SV regardless of the species (Table 1). For SPE, the trend was comparable to the one of the  
215 pollination success rate: 11–12 a.m. had highest SPE values (6.01% for *D. alata* and 22.97% for  
216 *D. rotundata*). Lowest values were recorded at 4–5 p.m. for both *D. alata* (0.11%) and *D.*  
217 *rotundata* (9.51%). At the monthly basis, the SPE varied with months, October being optimal for  
218 *D. alata* (10.3%) and September for *D. rotundata* (18.1%). October (12.2%) and December (0.2%)  
219 were worst for *D. rotundata* and *D. alata*, respectively (S3 Fig). For *D. alata*, October had once  
220 again the highest SSR (28.1%) and December the lowest (2.3%). August had highest SSR (60.5%)  
221 for *D. rotundata* and October the lowest (30.1%) (S4 Fig). Seed viability was indifferent to  
222 monthly variabilities and ranged from 70.6–75.6% for *D. alata* and 75.3–81.6% for *D. rotundata*  
223 (S5 Fig).

224 At weekly basis, there were significant differences among weekly SPE (Fig 8), SSR (Fig 9), and  
225 SV (Fig 10). Second (10.8) and third (11.8%) weeks had highest SPE for *D. alata* while highest

226 SPE were on fourth (21.9%) and fifth (22.8%) weeks for *D. rotundata*. Lowest SPE were in the  
 227 6<sup>th</sup> to 8<sup>th</sup> weeks (0%) for *D. alata* and second (7.2%) and 8<sup>th</sup> (9.9%) weeks for *D. rotundata*. SSR  
 228 values were not significantly different for weeks 1 to 5 (17.1–29.0%) after which it decreased  
 229 significantly in *D. alata* crossing blocks (0.0–8.3%). For *D. rotundata*, SSR had a similar trend as  
 230 for SPE, the second week having lowest SSR (23.3%) and week 1 (65.3), week 4 (60.5%) and  
 231 week 5 (63.1%) had the highest SSR. *D. alata* seed viability did not vary much across weeks (Fig  
 232 10) while for *D. rotundata*, the second week (56.8%) had significantly lower seed viability than  
 233 all other weekly means (74.8–82.3%).

234 **Table 1. Pollination time and seed production efficiency (SPE), seed setting rate (SSR) and seed**  
 235 **viability (SV)**

| Species             | Crossing time    | SPE (%) | SSR (%) | SV (%) |
|---------------------|------------------|---------|---------|--------|
| <i>D. alata</i>     | 8–9 h            | 5.16    | 20.78   | 68.94  |
|                     | 9–10h            | 3.43    | 21.65   | 78.24  |
|                     | 10–11h           | 5.63    | 27.49   | 79.95  |
|                     | 11–12h           | 6.01    | 23.47   | 70.84  |
|                     | 12–13h           | 2.11    | 18.43   | 64.16  |
|                     | 13–14h           | 4.91    | 27.21   | 82.58  |
|                     | 14–15h           | 2.94    | 16.46   | 80.88  |
|                     | 15–16h           | 1.98    | 22.17   | 66.07  |
|                     | 16–17h           | 0.11    | 0.00    | 41.67  |
|                     | Mean (%)         | 3.96    | 22.53   | 74.26  |
| <i>D. rotundata</i> | 8–9h             | 15.27   | 56.62   | 78.67  |
|                     | 9–10h            | 16.66   | 48.54   | 75.36  |
|                     | 10–11h           | 17.57   | 55.59   | 76.95  |
|                     | 11–12h           | 22.97   | 56.70   | 77.00  |
|                     | 12–13h           | 20.83   | 59.96   | 78.21  |
|                     | 13–14h           | 16.73   | 61.05   | 82.23  |
|                     | 14–15h           | 12.75   | 41.37   | 77.29  |
|                     | 15–16h           | 18.70   | 45.99   | 76.08  |
|                     | 16–17h           | 9.51    | 47.99   | 78.57  |
|                     | Mean (%)         | 17.65   | 52.83   | 77.02  |
|                     | Overall mean (%) | 9.99    | 42.51   | 76.22  |

236

**A**

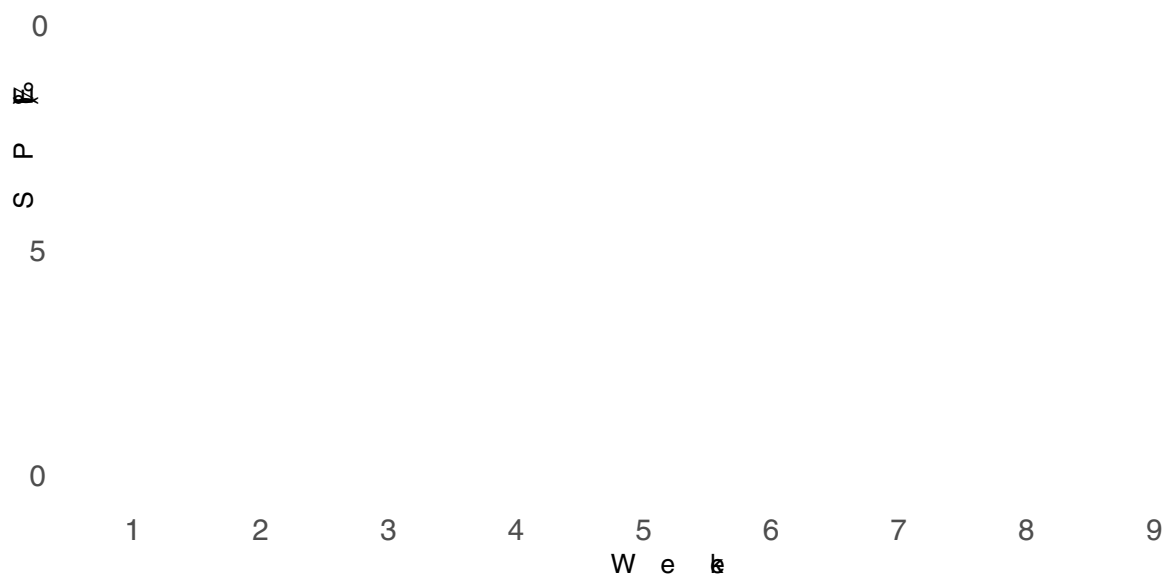

**B**

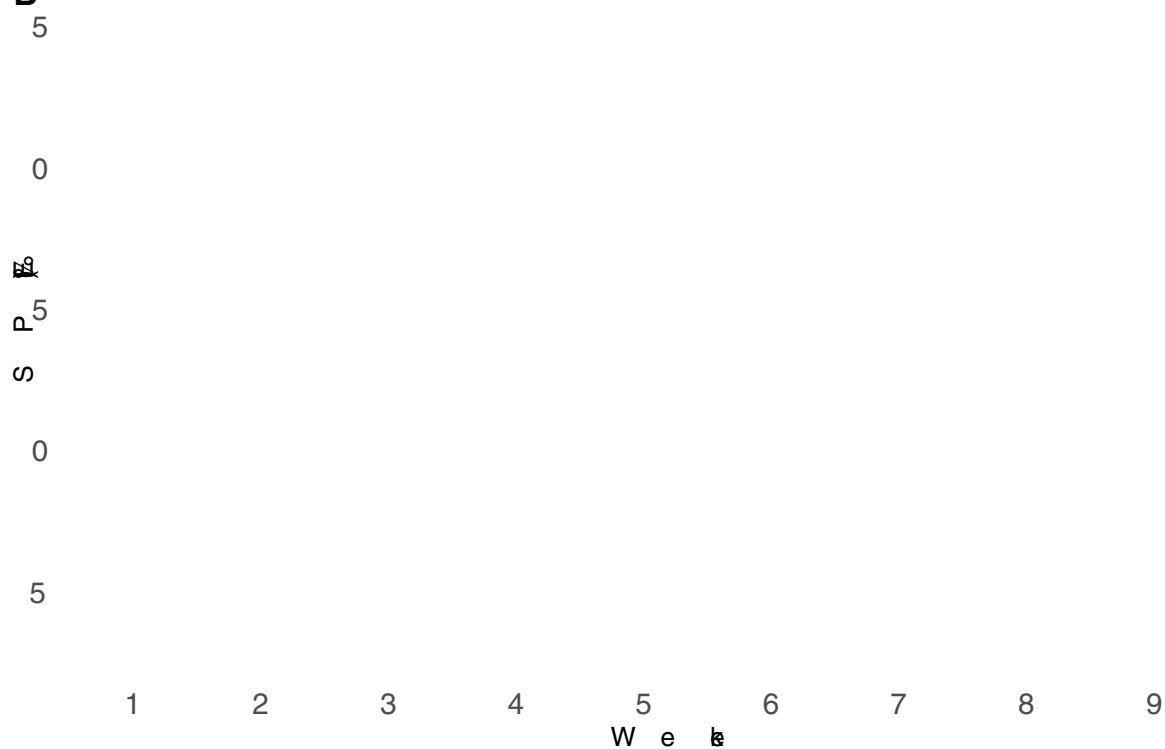

237

238 **Fig 8. Weekly seed production efficiency across the crossing window: (A) *D. alata* and (B) *D.***  
239 ***rotundata*.** Week 1 for *D. alata* corresponded to the second week of October while week 9 was the

240 second week of December. Week 1 for *D. rotundata* referred to second week of August while  
241 week 9 corresponded to the second week of October.

**A**

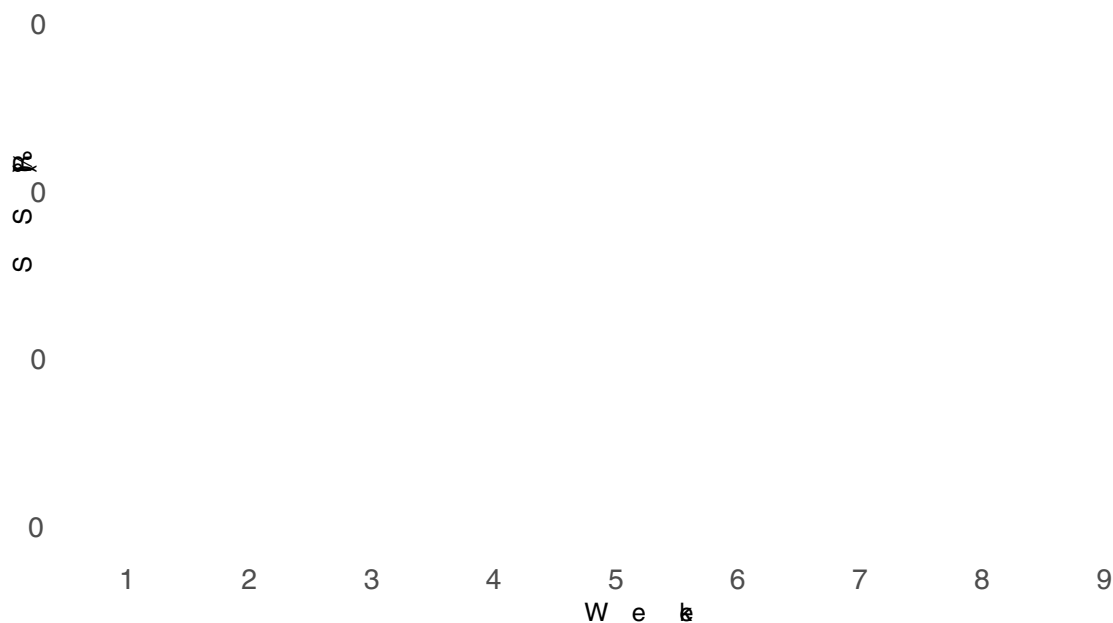

**B**

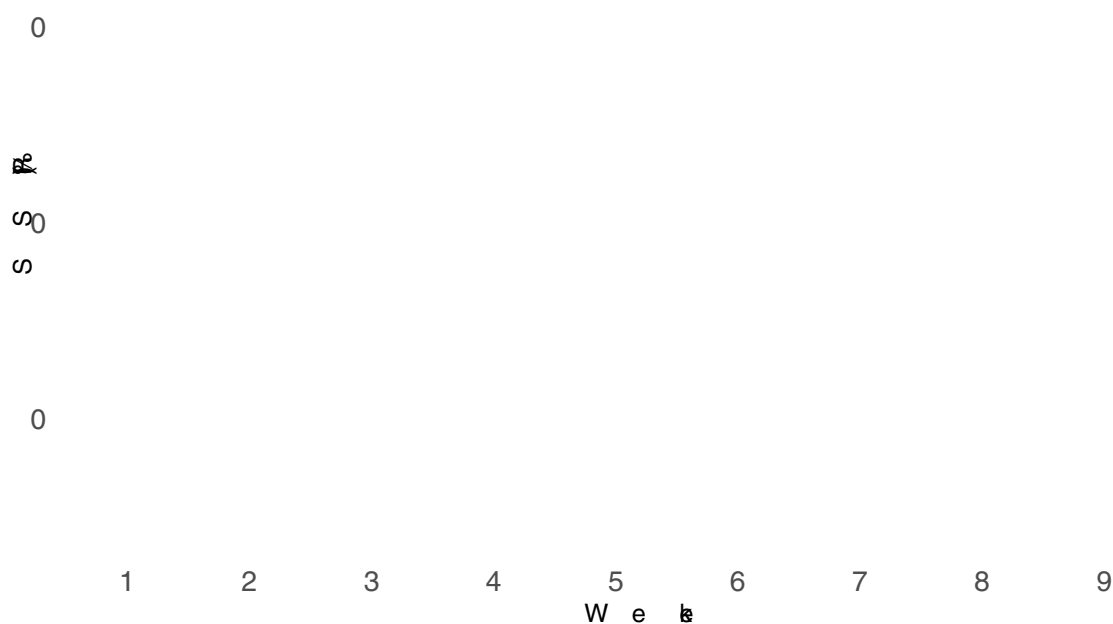

242

243 **Fig 9. Weekly seed setting rate (SSR) across the crossing windows: (A) *D. alata* and (B) *D. rotundata*.**  
244 Week 1 for *D. alata* corresponded to the second week of October while week 9 was the second  
245 week of December. Week 1 for *D. rotundata* referred to second week of August while week 9  
246 corresponded to the second week of October.

**A**

0  
%  
S  
0

0

1

2

3  
W e e k

4

5

**B**

0

%  
S  
0

0

1

2

3

4

5  
W e e k

6

7

8

9

247



248 **Fig 10. Weekly seed viability rate across the crossing windows: (A) *D. alata* and (B) *D. rotundata*.**  
249 Week 1 for *D. alata* corresponded to the second week of October. We had no seed for viability  
250 test for weeks 6–9. Week 1 for *D. rotundata* referred to second week of August while week 9  
251 corresponded to the second week of October.

## 252 **Discussion**

### 253 **Pollination success depended on crossing time**

254 Yam breeding is challenged by sexual reproduction abnormalities (sparse, irregular, and  
255 asynchronous flowering, cross compatibility barriers and low fertility) because of the  
256 domestication process that favored vegetative propagation at the expense of botanical seeds  
257 (Mondo et al., 2020). The International Institute of Tropical Agriculture (IITA) has devised a series  
258 of studies to control those reproduction abnormalities. This study is a continuation of such efforts  
259 and aimed to update recommendations on optimum time for hand pollination in yam breeding. We  
260 realized that the pollination success varied with the year, month, week, and hour of the day when  
261 the hand pollination is performed. The year, month, week, and hour of the day with well-distributed  
262 rainfall, high relative humidity and moderate temperatures were conducive to hand pollination for  
263 both *D. alata* and *D. rotundata* yam species. The year 2021 was more wet than 2020 and thus  
264 recorded higher pollination success rate than 2020. That finding agreed with Mondo et al. (2022)  
265 who showed variability in pollination success across years while using 2010–2020 crossing block  
266 information. *D. alata* was more sensitive to the time of pollination than *D. rotundata*. For instance,  
267 Mondo et al. (2021a) showed that *D. rotundata* pollen had a wide range of germination  
268 temperatures (15–35°C) compared to *D. alata* that gave better results at 25°C. The weather  
269 parameters' fluctuation with time could have explained the difference in pollination outcomes. A  
270 previous study on yam showed that weekly variability in rainfall, temperature, relative humidity,  
271 sunshine, and the number of rainy days within the yam flowering window (July to November)  
272 significantly influenced the pollination outcomes in either the *D. rotundata* or *D. alata* crossing  
273 blocks (Mondo et al., 2022). Abraham and Nair (1990) also reported that successful pollination in  
274 yam is significantly associated with high relative humidity and moderate atmospheric  
275 temperatures. As supported by this study, making crosses in some weeks of August or in the second  
276 half of October for *D. rotundata* and after 15<sup>th</sup> November for *D. alata* could result in low  
277 pollination success due to the suboptimal weather conditions. As recommended by Mondo et al.  
278 (2022) there is the need for supplemental irrigation in yam crossing blocks to reduce the water  
279 deficit's adverse effects on yam reproductive phases during these months. Since *D. alata* presents  
280 no dormancy at harvest, options of establishing the crossing block as early as March (with  
281 supplemental irrigation) could help avoiding the coincidence of its flowering window with harsh  
282 environmental conditions, as it was the case the last two years.

283 In contrast to most reports on yam pollination, *D. rotundata* had higher crossability rate and higher  
284 seed production efficiency than *D. alata* for both 2020 and 2021. However, *D. alata* had  
285 consistently higher values (31%) than *D. rotundata* (23%) when bulking 2010–2020 crossing  
286 block information at IITA (Mondo et al., 2022). For our study period (2020–2021), months  
287 corresponding with the *D. alata* flowering window (October–December) were drier compared to

288 those of *D. rotundata* (August–October) which benefited from relatively high and well-distributed  
289 rains and moderate temperatures. It is noteworthy that *D. alata* is sensitive to rainfall distribution,  
290 sunshine, relative humidity, and temperatures (Abraham and Nair, 1990; Mondo et al., 2022)  
291 which were suboptimal during *D. alata* flowering window.

292  
293 For both seasons, crosses made in morning hours (8–12 a.m.) had better results than those from  
294 afternoons for *D. alata*. Though not significant, mid-day seemed optimal for *D. rotundata*. Based  
295 on the crossing block data, 11 p.m. could be considered as optimal for both species while lowest  
296 rates were recorded at 4 p.m. for both species. However, *in vitro* pollen germination tests supported  
297 the mid-day (12 noon–2 p.m.) as the optimal time for pollen collection for both species while both  
298 morning and evening extremes should be avoided. This result aligned with findings by Akoroda  
299 (1983, 1985) that showed that *D. rotundata*'s better pollination success was achieved when crosses  
300 are made between 12 noon and 2 p.m. at IITA Ibadan, Nigeria. These findings partly dismissed  
301 our hypothesis that the optimal time for hand pollination, recommended four decades ago, might  
302 have been affected by climate changes. Since weather conditions are conducive for human labor  
303 in morning hours than the mid-day, we could recommend concentrating crossing activities at 11–  
304 12 a.m. interval for both species since morning was better than afternoons for *D. alata* and there  
305 were no significant differences between morning and mid-day hours for *D. rotundata*. Results  
306 showed an influence of the flower bagging on pollination outcomes, 4–6 days being the optimal  
307 interval between flower bagging and crossing time. Further investigations are necessary to  
308 elucidate reasons behind the influence of bagging-to-crossing time interval in yam crossing blocks.

309 **The seed setting rate and the seed viability were less affected by the hour of crossing but**  
310 **varied with the month and week of crossing**

311 Only the pollination success rate and the SPE varied with the hour of pollination, no particular  
312 pattern existed for the SSR and SV regardless of the species. For the SPE, the trend was  
313 comparable to the one of the pollination success rate: 11–12 a.m. had highest SPE values for both  
314 species while lowest values were recorded at 4–5 p.m. At the monthly basis, the SPE varied with  
315 months, October being optimal for *D. alata* and September for *D. rotundata*. October and  
316 December were worst for *D. rotundata* and *D. alata*, respectively. For *D. alata*, October had once  
317 again the highest SSR and December the lowest. August had highest SSR for *D. rotundata* and  
318 October the lowest. Seed viability was indifferent to monthly variabilities for both species.

319 There were significant differences among weekly SPE, SSR, and SV, weeks with conducive  
320 climatic conditions provided the best outcomes. Bandeira e Sousa et al. (2021) showed that  
321 environmental factors (temperature, rainfall, and photoperiod) contribute to a post-zygotic barrier  
322 in crops like cassava. They showed that high temperatures induced flower abortion and reduced  
323 the number of female flowers per inflorescence and seed setting rate. There was also a decreased  
324 pollen tube growth rate at higher average temperatures than lower temperatures, supporting the  
325 hypothesis that environmental conditions affect the efficiency of sexual reproduction, and that  
326 appropriate planning of planting dates and locations can maximize seed production (Ramos Abril

327 et al., 2019; Bandeira e Sousa et al., 2021). Environmental factors such as rainfall and temperature  
328 had also affected flowering, pollen production, and fruit development in cocoa (Omolaja et al.,  
329 2009).

### 330 **Conclusion**

331 This study, based on two-year crossing data, showed that the time of pollination had an influence  
332 on the pollination success rates. The year, month, week, and hour of the day with well-distributed  
333 rainfall, high relative humidity and moderate temperatures were conducive to hand pollination for  
334 both yam species. Crossing block data, weather information, and *in vitro* pollen germination  
335 seemed to encourage morning to mid-day hybridization for better pollination results. Special  
336 measures should be devised for *D. alata* as it was the most sensitive to weather conditions, and the  
337 months corresponding to its flowering window had globally suboptimal climatic conditions for  
338 both years.

### 339 **Supporting information**

340 **S1 Fig. Genotypic variability in pollen germination in *D. alata* and *D. rotundata***  
341 **S2 Fig. Relationship between the bagging–crossing time interval and pollination success**  
342 **S3 Fig. Monthly variability in SPE for *D. alata* and *D. rotundata***  
343 **S4 Fig. Monthly variability in SSR for *D. alata* and *D. rotundata***  
344 **S5 Fig. Monthly variability in seed viability for *D. alata* and *D. rotundata***  
345 **S1 Table. Description of yam genotypes used in hand pollination experiment**  
346 **S2 Table. ANOVA table for pollination success across crossing hours for *D. alata***

### 347 **Acknowledgments**

349 The funding support from the Bill & Melinda Gates Foundation (BMGF) is acknowledged. We  
350 are also grateful to the yam breeding team at IITA Ibadan for active participation in data collection.  
351 The first author is grateful for the African Union Commission's scholarship for his Ph.D. studies  
352 at the Pan African University-Institute of Life and Earth Sciences (PAULESI). Yannick  
353 Mugumaarhama and Géant B. Chuma are acknowledged for statistical advice.

354 **Data Availability Statement:** All relevant data are within the manuscript and its [Supporting Information](#)  
355 files.

356  
357 **Funding:** Bill & Melinda Gates Foundation (BMGF), African Union  
358

359 **Competing interests:** There was no competing interest among authors  
360

### 361 **Author Contributions**

362  
363 **Conceptualization:** Asrat Asfaw, Jean M. Mondo, Paterne A. Agre

364 **Data curation:** Jean M. Mondo

365 **Formal analysis:** Jean M. Mondo, Paterne A. Agre

366 **Funding acquisition:** Asrat Asfaw

367 **Investigation:** Jean M. Mondo  
368 **Methodology:** Asrat Asfaw, Jean M. Mondo, Paterne A. Agre  
369 **Project administration:** Asrat Asfaw, Paterne A. Agre  
370 **Resources:** Asrat Asfaw  
371 **Supervision:** Asrat Asfaw, Paterne A. Agre, Malachy O. Akoroda  
372 **Writing – original draft:** Jean M. Mondo, Paterne A. Agre, Asrat Asfaw  
373 **Writing – review & editing:** All authors  
374

## 375 References

- 376 1. Abraham K, Nair PG. Floral biology and artificial pollination in *Dioscorea alata* L. *Euphytica*.  
377 1990; 48: p. 45–51.
- 378 2. Agre P, Nwachukwu C, Olasanmi B, Obidiegwu J, Nwachukwu E, Adebola P, De Koeyer D,  
379 Asrat A. Sample preservation and plant sex prediction in white guinea yam (*Dioscorea*  
380 *rotundata* Poir.). *Journal of Applied Biotechnology Reports*. 2020; 7(3): p. 145–151.
- 381 3. Akoroda MO. Floral biology in relation to hand pollination of white yam. *Euphytica*. 1983;  
382 32: p. 831–838.
- 383 4. Akoroda MO. Pollen management for controlled hybridization of white yam. *Scientia*  
384 *Horticulturae*. 1985; 25: p. 201–209.
- 385 5. Asiedu R, Sartie A. Crops that feed the world 1. Yams. *Food Security*. 2010; 2: p. 305–315.  
386 <https://doi.org/10.1007/s12571-010-0085-0>
- 387 6. Babayoko Y, Kouakou AM, Dibi KEB, Ehounou AE, Essis BS, Nzue B, Kouassi AB, Nguetta  
388 AS, Adebola PO. Effet de la période de pollinisation manuelle sur la fructification de l'igname  
389 (*Dioscorea rotundata* Poir; Dioscoreaceae) en Côte d'Ivoire. *European Scientific Journal*.  
390 2019; 15(27): p. 448–464.
- 391 7. Bandeira e Sousa M, Andrade LR, Souza EH, Alves AA, de Oliveira EJ. Reproductive barriers  
392 in cassava: Factors and implications for genetic improvement. *PloS one*. 2021;  
393 16(11):e0260576. <https://doi.org/10.1371/journal.pone.0260576>
- 394 8. Bhattacharya A, Mandal S. Pollination, pollen germination and stigma receptivity in *Moringa*  
395 *oleifera* Lamk. *Grana*. 2004; 43(1): p. 48–56.
- 396 9. Di-Giovanni F, Kevan PG. Factors affecting pollen dynamics and its importance to pollen  
397 contamination: a review. *Canadian Journal of Forest Research*. 1991; 21(8): p.1155–1170.
- 398 10. Frossard E, Aighewi BA, Aké S, Barjolle D, Baumann P, Bernet T, Dao D, Diby LN, Floquet  
399 A, Hgaza VK, Ilboudo LJ, Kiba DI, Mongbo RL, Nacro HB, Nicolay GL, Oka E, Ouattara  
400 YF, Pouya N, Senanayake RL, Six J, Traoré OI. The challenge of improving soil fertility in  
401 yam cropping systems of West Africa. *Frontiers in Plant Science*.2017; 8: p.1953.  
402 doi:10.3389/fpls.2017.01953
- 403 11. He G, Hu F, Ming J, Liu C, Yuan S. Pollen viability and stigma receptivity in *Lilium* during  
404 anthesis. *Euphytica*. 2017; 213(10): p.1–10.
- 405 12. Katano K, Oi T, Suzuki N. Failure of pollen attachment to the stigma triggers elongation of  
406 stigmatic papillae in *Arabidopsis thaliana*. *Frontiers in Plant Science*. 2020; 11: p.989.
- 407 13. Maity A, Chakarbarty SK, Pramanik P, Gupta R, Parmar SS, Sharma DK. Response of stigma  
408 receptivity in CMS and male fertile line of Indian mustard (*B. juncea*) under variable thermal  
409 conditions. *International Journal of Biometeorology*. 2019; 63(2): p.143–152.
- 410 14. Martin FW, Cabanillas E, Ortiz S. Natural pollination, hand pollination and crossability of  
411 some Mexican species of *Dioscorea*. *Tropical Agriculture*. 1963; 40: p. 135–141.

- 412 15. Mondo JM, Agre PA, Asiedu R, Akoroda MO, Asfaw A. Genome-wide association studies  
413 for sex determination and cross-compatibility in water yam (*Dioscorea alata* L.). *Plants*.  
414 2021a; 10(7): p.1412.
- 415 16. Mondo JM, Agre PA, Asiedu R, Akoroda MO, Asfaw A. Optimized Protocol for In Vitro  
416 Pollen Germination in Yam (*Dioscorea* spp.). *Plants*. 2021b; 10(4): p.795.
- 417 17. Mondo JM, Agre PA, Edemodu A, Adebola P, Asiedu R, Akoroda MO, Asfaw A. Floral  
418 Biology and Pollination Efficiency in Yam (*Dioscorea* spp.). *Agriculture*. 2020; 10(11):  
419 p.560.
- 420 18. Mondo JM, Agre PA, Edemodu A, Asiedu R, Akoroda MO, Asfaw A. Cross compatibility in  
421 intraspecific and interspecific hybridization in yam (*Dioscorea* spp.). *Scientific Reports*. 2022;  
422 12(1): p. 1–13.
- 423 19. Omolaja SS, Aikpokpodion P, Adedeji S, Vwioko DE. Rainfall and temperature effects on  
424 flowering and pollen productions in cocoa. *African Crop Science Journal*. 2009; 17(1): p. 41–  
425 48.
- 426 20. Raina M, Kaul V. Assessment of stigma receptivity via papillar integrity in *Kigelia pinnata*  
427 (Bignoniaceae). *Proceedings of the National Academy of Sciences, India Section B:*  
428 *Biological Sciences*. 2019; 89(3): p. 867–875.
- 429 21. Ramos Abril LN, Pineda LM, Wasek I, Wedzony M, Ceballos H. Reproductive biology in  
430 cassava: stigma receptivity and pollen tube growth. *Communicative & Integrative*  
431 *Biology*. 2019; 12(1): p. 96–111.
- 432 22. Salami AE. Performance of Hand-pollinated Maize Genotypes at Different Daytimes in a  
433 Nigeria Forest Agro-ecosystem. *Journal of Experimental Agriculture International*. 2016; p.1–  
434 9.
